# Supplementary material for: Ultramicronized Palmitoylethanolamide Inhibits NLRP3 Inflammasome Expression and Pro-Inflammatory Response Activated by SARS-CoV-2 Spike Protein in Cultured Murine Alveolar Macrophages
Source: MDPI journal article supplement (doi:10.3390/metabo11090592), 2021-09-02
Supplement: s1 [file s1]

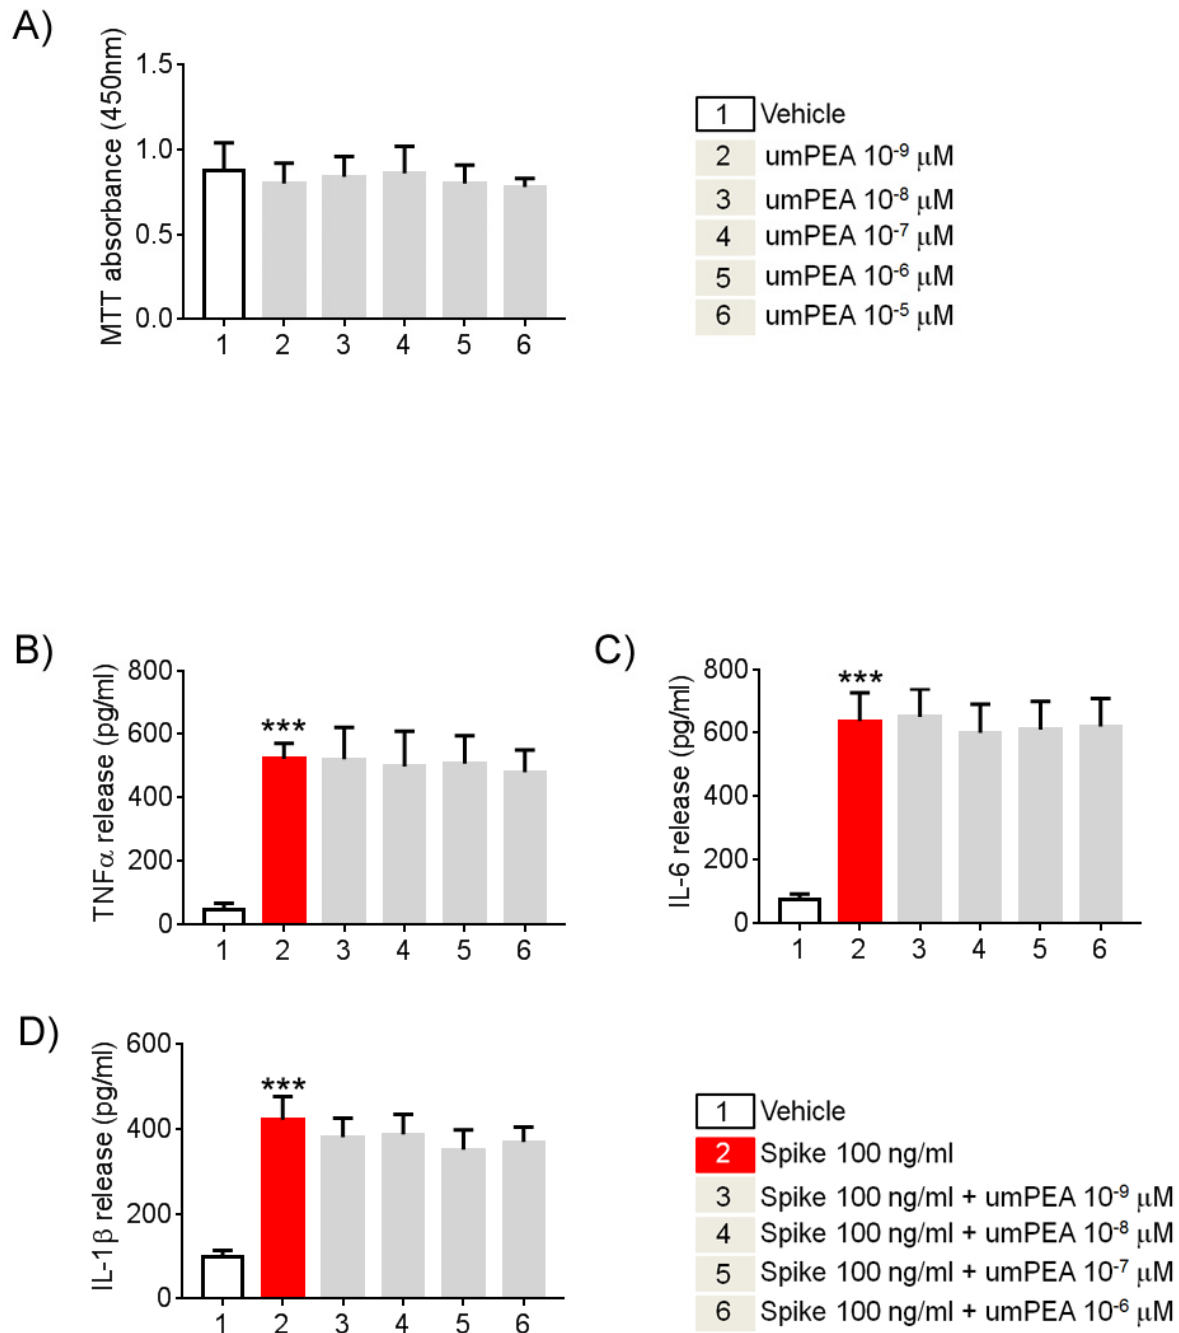

**Supplementary Figure S1.** (A) MTT-formazan absorbance analysis showing the effect of um-PEA (10<sup>-9</sup>–10<sup>-5</sup> μM) on wild-type murine-derived alveolar macrophages at 24 h. Effects of um-PEA (10<sup>-9</sup>–10<sup>-6</sup> μM) on (B) TNFα, (C) IL-6 and (D) IL-1β release following 24 h Spike protein (100 ng/mL) challenge in PPAR-α<sup>-/-</sup> murine-derived alveolar macrophages. Results are expressed as a mean ± SD of n = 4 experiments performed in triplicate. \*\*\* *p* < 0.001 vs. vehicle group.
